# Supplementary material for: The efficacy of fall-risk-increasing drug (FRID) withdrawal for the prevention of falls and fall-related complications: protocol for a systematic review and meta-analysis
Source: Springer Nature journal article supplement (doi:10.1186/s13643-017-0426-6), 2017-02-20
Supplement: MOESM2 [file 12078066]

## Additional File 2: Example of search strategy in Ovid MEDLINE

Ovid MEDLINE(R) In-Process & Other Non-Indexed Citations, Ovid MEDLINE(R) Daily and  
Ovid MEDLINE(R) 1946 to Present

| #  | Searches                                                                                                                                                                                                                                                                                                                                                                                                                                                                             |
|----|--------------------------------------------------------------------------------------------------------------------------------------------------------------------------------------------------------------------------------------------------------------------------------------------------------------------------------------------------------------------------------------------------------------------------------------------------------------------------------------|
| 1  | exp Accidental Falls/pc [Prevention & Control]                                                                                                                                                                                                                                                                                                                                                                                                                                       |
| 2  | fall.mp. [mp=title, abstract, original title, name of substance word, subject heading word, keyword heading word, protocol supplementary concept word, rare disease supplementary concept word, unique identifier]                                                                                                                                                                                                                                                                   |
| 3  | falls.mp. [mp=title, abstract, original title, name of substance word, subject heading word, keyword heading word, protocol supplementary concept word, rare disease supplementary concept word, unique identifier]                                                                                                                                                                                                                                                                  |
| 4  | exp Deprescriptions/                                                                                                                                                                                                                                                                                                                                                                                                                                                                 |
| 5  | ((medicat* or drug*) adj3 (deprescrib* or withdraw* or cessat* or stop* or discontin*)).mp. [mp=title, abstract, original title, name of substance word, subject heading word, keyword heading word, protocol supplementary concept word, rare disease supplementary concept word, unique identifier]                                                                                                                                                                                |
| 6  | ((antihypertensive* or diuretic* or beta-blocker* or sedative* or hypnotic* or neuroleptic* or antipsychotic* or antidepressant* or benzodiazepine* or narcotic* or opioid* or narcotic* or NSAID*) adj3 (deprescrib* or withdraw* or cessat* or stop* or discontin*)).mp. [mp=title, abstract, original title, name of substance word, subject heading word, keyword heading word, protocol supplementary concept word, rare disease supplementary concept word, unique identifier] |
| 7  | fall-risk increasing drugs.mp.                                                                                                                                                                                                                                                                                                                                                                                                                                                       |
| 8  | FRID.mp.                                                                                                                                                                                                                                                                                                                                                                                                                                                                             |
| 9  | ((medicat* or drug*) adj3 (review* or improv* or program*)).mp. [mp=title, abstract, original title, name of substance word, subject heading word, keyword heading word, protocol supplementary concept word, rare disease supplementary concept word, unique identifier]                                                                                                                                                                                                            |
| 10 | exp "Drug-Related Side Effects and Adverse Reactions"/pc [Prevention & Control]                                                                                                                                                                                                                                                                                                                                                                                                      |
| 11 | exp Medication Therapy Management/ or exp "Drug Utilization Review"/                                                                                                                                                                                                                                                                                                                                                                                                                 |
| 12 | 4 or 5 or 6 or 7 or 8 or 9 or 10 or 11                                                                                                                                                                                                                                                                                                                                                                                                                                               |
| 13 | 1 or 2 or 3                                                                                                                                                                                                                                                                                                                                                                                                                                                                          |
| 14 | 12 and 13                                                                                                                                                                                                                                                                                                                                                                                                                                                                            |
| 15 | remove duplicates from 14                                                                                                                                                                                                                                                                                                                                                                                                                                                            |
| 16 | exp Clinical Trial/                                                                                                                                                                                                                                                                                                                                                                                                                                                                  |
| 17 | (randomized or randomised).ab,ti.                                                                                                                                                                                                                                                                                                                                                                                                                                                    |
| 18 | placebo.ab,ti.                                                                                                                                                                                                                                                                                                                                                                                                                                                                       |
| 19 | randomly.ab,ti.                                                                                                                                                                                                                                                                                                                                                                                                                                                                      |

|    |                                        |
|----|----------------------------------------|
| 20 | groups.ab,ti.                          |
| 21 | randomized controlled trial.pt.        |
| 22 | controlled clinical trial.pt.          |
| 23 | 16 or 17 or 18 or 19 or 20 or 21 or 22 |
| 24 | 15 and 23                              |
